# Supplementary material
Source: PubMed Central journal article supplement (PMC7167357)
Supplement: NIHMS1565618-supplement-1.pdf [file NIHMS1565618-supplement-1.pdf]

## Supplemental Material

*A multi-resolution air temperature model for France from MODIS and Landsat thermal data*

Ian Hough; Allan C Just, Bin Zhou; Michael Dorman; Johanna Lepeule; Itai Kloog

### Table of Contents

**Appendix A.** Statistical methods for stages 1 and 2

**Table S1.** Daily  $T_a$  observed at included weather stations during the 17-year study period

**Table S2.** Aggregations of Corine Land Cover (CLC) classes used in this study

**Table S3.** Stage 1  $T_{\min}$  model performance (predicting daily 1 km  $T_{\min}$  from LST): 10-fold cross-validated performance by year; overall, spatial, and temporal components.

**Table S4.** Stage 1  $T_{\text{mean}}$  model performance (predicting daily 1 km  $T_{\text{mean}}$  from LST): 10-fold cross-validated performance by year; overall, spatial, and temporal components.

**Table S5.** Stage 1  $T_{\max}$  model performance (predicting daily 1 km  $T_{\max}$  from LST): 10-fold cross-validated performance by year; overall, spatial, and temporal components.

**Table S6.** Stage 4 model performance (predicting daily 200 m residuals with an ensemble): 10-fold cross-validated performance by year.

**Fig. S1.** Population density of France and urban areas with at least 50 000 residents.

**Fig. S2.** Relative importance (%) of the predictors in the stage 3 random forest model (predicting 200 m residual). Each box shows the distribution for the different model years (2000 – 2016).

**Fig. S3.** Relative importance (%) of the predictors in the stage 3 XGBoost model (predicting 200 m residual). Each box shows the distribution for the different model years (2000 – 2016).

**Fig. S4.** Predicted 1 km  $T_a$  from the stage 2 model alone (top row) and with predicted 200 m  $T_{\min}$  from the stage 4 model overlaid (bottom row) on Feb 18, 2003 over the Paris metropolitan area.

**Fig. S5.** Predicted 1 km  $T_a$  from the stage 2 model alone (top row) and with predicted 200 m  $T_{\min}$  from the stage 4 model overlaid (bottom row) on Nov 01, 2015 over the city of Toulouse.

**Fig. S6.** Predicted 1 km  $T_a$  from the stage 2 model alone (top row) and with predicted 200 m  $T_{\min}$  from the stage 4 model overlaid (bottom row) on Aug 10, 2012 over the city of Nancy.

## Appendix A. Statistical methods for stages 1 and 2

### Stage 1: predicting 1 km $T_a$ from LST

In stage 1 we predict  $T_a$  for all 1 km grid cells and days where MODIS 1 km LST is available. Our method is similar to that used in Kloog et al. (2017) with the addition of some explanatory variables and nesting of daily random effects within climatic regions. We start by associating each weather station  $T_a$  observation with the nearest 1 km grid cell for which LST is available on the day of the observation, up to a maximum distance of 1.5 km. The number of  $T_a$  observations matched with LST varies by year (**Table S3 – Table S5**); the average is about 354 thousand for  $T_{\min}$ , 205 thousand for  $T_{\text{mean}}$ , and 324 thousand for  $T_{\max}$ . We use these to calibrate a mixed model with the equation:

$$T_{a_{ij}} = (\alpha + \mu_{jk}) + (\beta_1 + \nu_{jk}) \times \text{LST}_{ij} + \beta_2 \times \text{Emissivity}_{ij} + \beta_3 \times \text{NDVI}_{im} + \sum_{l=1}^4 \beta_{4l} \times \text{Land Cover}_{ily} + \beta_5 \times \text{Elevation}_i + \beta_6 \times \text{Population}_i + \varepsilon_{ij} \quad \text{Eq. 1}$$

where  $T_{a_{ij}}$  is the observed ambient temperature associated with 1 km grid cell  $i$  on day  $j$ ;  $\alpha$  is a fixed intercept and  $\mu_{jk}$  is a random intercept on day  $j$  for the climatic region  $k$  that contains cell  $i$ ;  $\beta_1$  is a fixed coefficient for LST and  $\nu_{jk}$  is a random coefficient for LST on day  $j$  for the climatic region  $k$  that contains cell  $i$ ;  $\text{LST}_{ij}$  is the MODIS 1 km land surface temperature of cell  $i$  on day  $j$ .  $\beta_2$ – $\beta_6$  are fixed coefficients of the other explanatory variables;  $\text{Emissivity}_{ij}$  is the emissivity of cell  $i$  on day  $j$ ;  $\text{NDVI}_{im}$  is the MODIS NDVI of cell  $i$  in the month  $m$  that contains day  $j$ ;  $\beta_l$  is a fixed slope for each of the  $l$  land cover groups and  $\text{Land Cover}_{ily}$  is the fraction of cell  $i$  occupied by land cover group  $l$  in the CLC inventory year  $y$  closest to day  $j$ ;  $\text{Elevation}_i$  is the mean elevation of cell  $i$ ;  $\text{Population}_i$  is the population of cell  $i$ ; and  $\varepsilon_{ij}$  is the error for cell  $i$  on day  $j$ . Specifically, we use the R package lme4 (Bates et al., 2015) to estimate a single value for the fixed intercept  $\alpha$  and each fixed coefficient  $\beta_1$ – $\beta_6$  as well as a value in each climatic region on each day for the random intercept  $\mu$  and the random coefficient  $\nu$  using maximum likelihood. The random intercept and coefficient allow the relationship between LST and  $T_a$  to vary by day and between climatic regions, improving model fit. We then apply backwards stepwise regression, removing predictors that do not reduce the Akaike information criterion (AIC) by at least 5, and refit the final model using restricted maximum likelihood. We repeat this process for each of the four LST measures (Aqua daytime, Aqua nighttime, Terra daytime, and Terra nighttime) and select the model with the lowest 10-fold cross-validated RMSE. We use the final stage 1 model to predict  $T_a$  for all 1 km grid cell-days with LST.

### *Stage 2: predicting 1 km $T_a$ where LST is unavailable*

In stage 2 we predict  $T_a$  for the 1 km grid cell-days where LST was not available (usually due to cloud cover). We start by using inverse distance weighting to interpolate daily observed  $T_a$  from all weather stations across continental France. We then use all 1 km cell-days with LST to calibrate a mixed model with the equation:

$$T_{ap\_s1ij} = (\alpha + \mu_i) + (\beta + \nu_i) \times T_{IDWij} + \varepsilon_{ij} \quad \text{Eq. 2}$$

where  $T_{ap\_s1ij}$  is the stage 1 predicted  $T_a$  of 1 km grid cell  $i$  on day  $j$ ;  $\alpha$  and  $\beta$  are the fixed intercept and slope, respectively;  $\mu_i$  and  $\nu_i$  are the random intercept and slope, respectively, for cell  $i$ ;  $T_{IDWij}$  is the inverse distance weighted  $T_a$  of cell  $i$  on day  $j$ ; and  $\varepsilon_{ij}$  is the error for cell  $i$  on day  $j$ . The random intercept and slope allow the relationship between  $T_{IDW}$  and  $T_{ap\_s1}$  to vary between grid cells, improving model fit. We use the calibrated model to predict  $T_a$  for 1 km grid cell-days where LST is unavailable. We combine the predictions from stage 1 and stage 2 to get daily 1 km predicted  $T_a$  ( $T_{ap\_1km}$ ) across the entire study domain.

**Table S1.** Daily  $T_a$  observed at included weather stations during the 17-year study period

|                   | N          | Min   | Mean | Max  | SD* |
|-------------------|------------|-------|------|------|-----|
| $T_{\min}$        | 13 464 964 | -31.2 | 6.8  | 30.3 | 6.5 |
| $T_{\text{mean}}$ | 7 888 798  | -28.2 | 11.3 | 34.4 | 7.1 |
| $T_{\max}$        | 13 464 848 | -26.0 | 16.5 | 44.1 | 8.3 |

\* SD = standard deviation

**Table S2.** Aggregations of Corine Land Cover (CLC) classes used in this study

| Aggregated category | CLC codes | CLC class descriptions                           |
|---------------------|-----------|--------------------------------------------------|
| Artificial          | 1         | Artificial areas                                 |
| Vegetation          | 2         | Agricultural areas                               |
|                     | 3.1       | Forests                                          |
|                     | 3.2       | Shrubs and/or herbaceous vegetation associations |
| Bare                | 3.3       | Open spaces with little or no vegetation         |
| Water               | 4         | Wetlands                                         |
|                     | 5         | Water bodies                                     |

**Table S3.** Stage 1  $T_{\min}$  model performance (predicting daily 1 km  $T_{\min}$  from LST): 10-fold cross-validated performance by year; overall, spatial, and temporal components.

| $T_{\min}$ |      |     | Overall        |      |      | Spatial        |      |      | Temporal       |      |      |
|------------|------|-----|----------------|------|------|----------------|------|------|----------------|------|------|
| Year       | LST* | N†  | R <sup>2</sup> | RMSE | MAE  | R <sup>2</sup> | RMSE | MAE  | R <sup>2</sup> | RMSE | MAE  |
| 2000       | TN   | 299 | 0.87           | 1.92 | 1.47 | 0.86           | 1.54 | 1.14 | 0.88           | 1.65 | 1.27 |
| 2001       | TN   | 332 | 0.92           | 1.88 | 1.43 | 0.91           | 1.50 | 1.10 | 0.93           | 1.65 | 1.25 |
| 2002       | TN   | 323 | 0.88           | 1.99 | 1.52 | 0.87           | 1.57 | 1.15 | 0.89           | 1.74 | 1.33 |
| 2003       | AN   | 405 | 0.94           | 1.88 | 1.41 | 0.91           | 1.67 | 1.21 | 0.96           | 1.50 | 1.10 |
| 2004       | AN   | 367 | 0.92           | 1.86 | 1.40 | 0.90           | 1.59 | 1.16 | 0.94           | 1.53 | 1.12 |
| 2005       | AN   | 398 | 0.94           | 1.89 | 1.42 | 0.91           | 1.65 | 1.20 | 0.95           | 1.53 | 1.12 |
| 2006       | AN   | 365 | 0.94           | 1.84 | 1.38 | 0.91           | 1.58 | 1.15 | 0.95           | 1.49 | 1.09 |
| 2007       | AN   | 385 | 0.91           | 1.88 | 1.41 | 0.89           | 1.60 | 1.17 | 0.93           | 1.52 | 1.11 |
| 2008       | AN   | 358 | 0.91           | 1.85 | 1.39 | 0.89           | 1.56 | 1.15 | 0.93           | 1.50 | 1.10 |
| 2009       | AN   | 386 | 0.93           | 1.86 | 1.41 | 0.90           | 1.63 | 1.20 | 0.95           | 1.49 | 1.09 |
| 2010       | AN   | 347 | 0.93           | 1.84 | 1.38 | 0.92           | 1.60 | 1.18 | 0.95           | 1.48 | 1.08 |
| 2011       | AN   | 392 | 0.90           | 1.95 | 1.48 | 0.87           | 1.67 | 1.24 | 0.92           | 1.54 | 1.13 |
| 2012       | AN   | 362 | 0.93           | 1.92 | 1.45 | 0.91           | 1.61 | 1.19 | 0.95           | 1.56 | 1.15 |
| 2013       | AN   | 322 | 0.93           | 1.87 | 1.39 | 0.91           | 1.56 | 1.15 | 0.94           | 1.53 | 1.11 |
| 2014       | AN   | 324 | 0.89           | 1.82 | 1.37 | 0.88           | 1.52 | 1.12 | 0.92           | 1.46 | 1.07 |
| 2015       | AN   | 336 | 0.91           | 1.95 | 1.47 | 0.88           | 1.68 | 1.24 | 0.93           | 1.57 | 1.14 |
| 2016       | AN   | 316 | 0.91           | 1.94 | 1.45 | 0.88           | 1.66 | 1.22 | 0.93           | 1.55 | 1.13 |

\* LST = source of LST; TN = Terra night; AN = Aqua night

† N = thousands of observations used to fit model

**Table S4.** Stage 1  $T_{\text{mean}}$  model performance (predicting daily 1 km  $T_{\text{mean}}$  from LST): 10-fold cross-validated performance by year; overall, spatial, and temporal components.

| $T_{\text{mean}}$ |      |     | Overall        |      |      | Spatial        |      |      | Temporal       |      |      |
|-------------------|------|-----|----------------|------|------|----------------|------|------|----------------|------|------|
| Year              | LST* | N†  | R <sup>2</sup> | RMSE | MAE  | R <sup>2</sup> | RMSE | MAE  | R <sup>2</sup> | RMSE | MAE  |
| 2000              | TN   | 153 | 0.96           | 1.20 | 0.87 | 0.94           | 1.14 | 0.80 | 0.96           | 1.00 | 0.73 |
| 2001              | TN   | 173 | 0.97           | 1.24 | 0.90 | 0.96           | 1.13 | 0.79 | 0.98           | 1.06 | 0.77 |
| 2002              | TN   | 171 | 0.96           | 1.25 | 0.90 | 0.94           | 1.17 | 0.80 | 0.96           | 1.08 | 0.78 |
| 2003              | TN   | 204 | 0.98           | 1.27 | 0.94 | 0.96           | 1.19 | 0.84 | 0.98           | 1.10 | 0.81 |
| 2004              | TN   | 196 | 0.97           | 1.27 | 0.92 | 0.95           | 1.16 | 0.81 | 0.97           | 1.12 | 0.80 |
| 2005              | TN   | 222 | 0.97           | 1.26 | 0.92 | 0.96           | 1.13 | 0.79 | 0.98           | 1.11 | 0.80 |
| 2006              | TN   | 205 | 0.97           | 1.29 | 0.93 | 0.96           | 1.17 | 0.82 | 0.98           | 1.13 | 0.81 |
| 2007              | TN   | 225 | 0.96           | 1.28 | 0.93 | 0.94           | 1.20 | 0.82 | 0.97           | 1.11 | 0.80 |
| 2008              | TN   | 215 | 0.96           | 1.27 | 0.92 | 0.94           | 1.17 | 0.83 | 0.97           | 1.09 | 0.79 |
| 2009              | TN   | 232 | 0.97           | 1.28 | 0.93 | 0.96           | 1.19 | 0.85 | 0.98           | 1.08 | 0.79 |
| 2010              | TN   | 209 | 0.97           | 1.25 | 0.90 | 0.96           | 1.19 | 0.84 | 0.98           | 1.04 | 0.76 |
| 2011              | TN   | 239 | 0.96           | 1.35 | 0.99 | 0.94           | 1.19 | 0.84 | 0.96           | 1.16 | 0.85 |
| 2012              | TN   | 224 | 0.97           | 1.35 | 0.98 | 0.96           | 1.22 | 0.86 | 0.97           | 1.16 | 0.85 |
| 2013              | TN   | 203 | 0.97           | 1.37 | 0.98 | 0.95           | 1.22 | 0.86 | 0.97           | 1.18 | 0.84 |
| 2014              | TN   | 201 | 0.96           | 1.24 | 0.90 | 0.94           | 1.13 | 0.80 | 0.96           | 1.05 | 0.76 |
| 2015              | TN   | 215 | 0.96           | 1.36 | 0.99 | 0.95           | 1.22 | 0.87 | 0.97           | 1.18 | 0.86 |
| 2016              | TN   | 205 | 0.96           | 1.38 | 1.00 | 0.94           | 1.26 | 0.90 | 0.97           | 1.19 | 0.86 |

\* LST = source of LST; TN = Terra night

† N = thousands of observations used to fit model

**Table S5.** Stage 1  $T_{\max}$  model performance (predicting daily 1 km  $T_{\max}$  from LST): 10-fold cross-validated performance by year; overall, spatial, and temporal components.

| $T_{\max}$ |      |     | Overall        |      |      | Spatial        |      |      | Temporal       |      |      |
|------------|------|-----|----------------|------|------|----------------|------|------|----------------|------|------|
| Year       | LST* | N†  | R <sup>2</sup> | RMSE | MAE  | R <sup>2</sup> | RMSE | MAE  | R <sup>2</sup> | RMSE | MAE  |
| 2000       | TD   | 265 | 0.94           | 1.78 | 1.33 | 0.90           | 1.56 | 1.13 | 0.95           | 1.38 | 1.02 |
| 2001       | TD   | 319 | 0.96           | 1.80 | 1.34 | 0.92           | 1.54 | 1.12 | 0.97           | 1.46 | 1.07 |
| 2002       | TD   | 314 | 0.94           | 1.83 | 1.37 | 0.90           | 1.56 | 1.14 | 0.95           | 1.46 | 1.08 |
| 2003       | TD   | 379 | 0.97           | 1.84 | 1.37 | 0.94           | 1.59 | 1.16 | 0.97           | 1.49 | 1.10 |
| 2004       | TD   | 334 | 0.95           | 1.79 | 1.33 | 0.93           | 1.51 | 1.09 | 0.97           | 1.45 | 1.06 |
| 2005       | TD   | 358 | 0.96           | 1.77 | 1.32 | 0.94           | 1.52 | 1.09 | 0.97           | 1.44 | 1.06 |
| 2006       | TD   | 337 | 0.96           | 1.86 | 1.38 | 0.92           | 1.59 | 1.16 | 0.97           | 1.52 | 1.11 |
| 2007       | TD   | 353 | 0.95           | 1.79 | 1.34 | 0.91           | 1.55 | 1.11 | 0.96           | 1.45 | 1.07 |
| 2008       | TD   | 318 | 0.95           | 1.77 | 1.32 | 0.91           | 1.52 | 1.11 | 0.96           | 1.41 | 1.04 |
| 2009       | TD   | 341 | 0.96           | 1.83 | 1.37 | 0.92           | 1.58 | 1.15 | 0.97           | 1.44 | 1.06 |
| 2010       | TD   | 308 | 0.96           | 1.77 | 1.32 | 0.93           | 1.56 | 1.13 | 0.97           | 1.38 | 1.01 |
| 2011       | TD   | 358 | 0.94           | 1.82 | 1.37 | 0.91           | 1.62 | 1.18 | 0.96           | 1.45 | 1.07 |
| 2012       | TD   | 332 | 0.96           | 1.83 | 1.37 | 0.92           | 1.61 | 1.18 | 0.97           | 1.46 | 1.08 |
| 2013       | TD   | 291 | 0.96           | 1.86 | 1.38 | 0.92           | 1.62 | 1.17 | 0.97           | 1.49 | 1.09 |
| 2014       | TD   | 300 | 0.94           | 1.73 | 1.29 | 0.91           | 1.51 | 1.11 | 0.95           | 1.36 | 1.01 |
| 2015       | TD   | 315 | 0.95           | 1.86 | 1.39 | 0.91           | 1.61 | 1.18 | 0.96           | 1.51 | 1.12 |
| 2016       | TD   | 290 | 0.95           | 1.82 | 1.36 | 0.91           | 1.60 | 1.17 | 0.96           | 1.47 | 1.08 |

\* LST = source of LST; TD = Terra day

† N = thousands of observations used to fit model

**Table S6.** Stage 4 model performance (predicting daily 200 m residuals with an ensemble): 10-fold cross-validated performance by year.

|      | $R_{T_{\min}}$ |                |      |      | $R_{T_{\text{mean}}}$ |                |      |      | $R_{T_{\max}}$ |                |      |      |
|------|----------------|----------------|------|------|-----------------------|----------------|------|------|----------------|----------------|------|------|
|      | N*             | R <sup>2</sup> | RMSE | MAE  | N*                    | R <sup>2</sup> | RMSE | MAE  | N*             | R <sup>2</sup> | RMSE | MAE  |
| 2000 | 842            | 0.88           | 0.47 | 0.30 | 425                   | 0.80           | 0.36 | 0.22 | 842            | 0.87           | 0.46 | 0.26 |
| 2001 | 834            | 0.85           | 0.49 | 0.32 | 427                   | 0.75           | 0.41 | 0.25 | 834            | 0.83           | 0.52 | 0.31 |
| 2002 | 829            | 0.87           | 0.50 | 0.33 | 431                   | 0.77           | 0.39 | 0.24 | 829            | 0.85           | 0.51 | 0.30 |
| 2003 | 824            | 0.78           | 0.66 | 0.43 | 431                   | 0.79           | 0.42 | 0.28 | 824            | 0.84           | 0.54 | 0.34 |
| 2004 | 829            | 0.77           | 0.64 | 0.40 | 447                   | 0.91           | 0.25 | 0.16 | 829            | 0.83           | 0.53 | 0.31 |
| 2005 | 825            | 0.75           | 0.70 | 0.44 | 467                   | 0.75           | 0.44 | 0.28 | 825            | 0.85           | 0.50 | 0.31 |
| 2006 | 815            | 0.74           | 0.68 | 0.41 | 471                   | 0.76           | 0.42 | 0.27 | 815            | 0.84           | 0.53 | 0.33 |
| 2007 | 817            | 0.79           | 0.64 | 0.41 | 480                   | 0.77           | 0.42 | 0.28 | 817            | 0.83           | 0.53 | 0.32 |
| 2008 | 810            | 0.78           | 0.63 | 0.39 | 486                   | 0.77           | 0.42 | 0.27 | 810            | 0.84           | 0.50 | 0.30 |
| 2009 | 803            | 0.78           | 0.66 | 0.42 | 488                   | 0.79           | 0.42 | 0.28 | 803            | 0.85           | 0.52 | 0.32 |
| 2010 | 801            | 0.77           | 0.65 | 0.39 | 490                   | 0.77           | 0.41 | 0.25 | 801            | 0.86           | 0.49 | 0.29 |
| 2011 | 793            | 0.80           | 0.67 | 0.43 | 487                   | 0.79           | 0.43 | 0.29 | 793            | 0.84           | 0.54 | 0.34 |
| 2012 | 776            | 0.78           | 0.66 | 0.42 | 482                   | 0.80           | 0.43 | 0.28 | 776            | 0.84           | 0.54 | 0.33 |
| 2013 | 748            | 0.76           | 0.65 | 0.40 | 476                   | 0.85           | 0.35 | 0.22 | 748            | 0.87           | 0.48 | 0.29 |
| 2014 | 733            | 0.80           | 0.60 | 0.38 | 470                   | 0.78           | 0.40 | 0.25 | 733            | 0.83           | 0.52 | 0.31 |
| 2015 | 709            | 0.79           | 0.66 | 0.43 | 461                   | 0.77           | 0.45 | 0.29 | 709            | 0.86           | 0.52 | 0.33 |
| 2016 | 692            | 0.78           | 0.67 | 0.42 | 458                   | 0.78           | 0.43 | 0.28 | 692            | 0.84           | 0.52 | 0.32 |

\* N = thousands of observations used to fit model

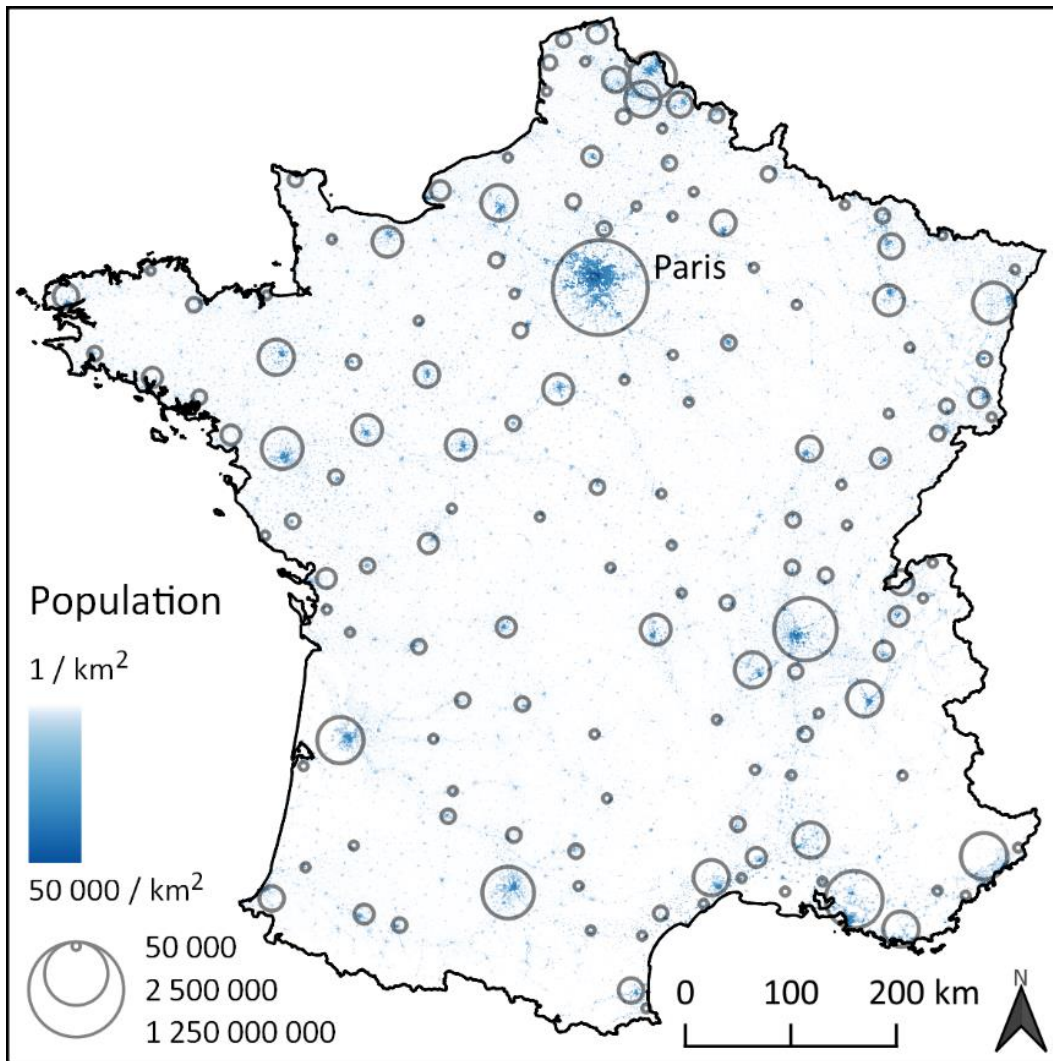

**Fig. S1.** Population density of France and urban areas with at least 50 000 residents.

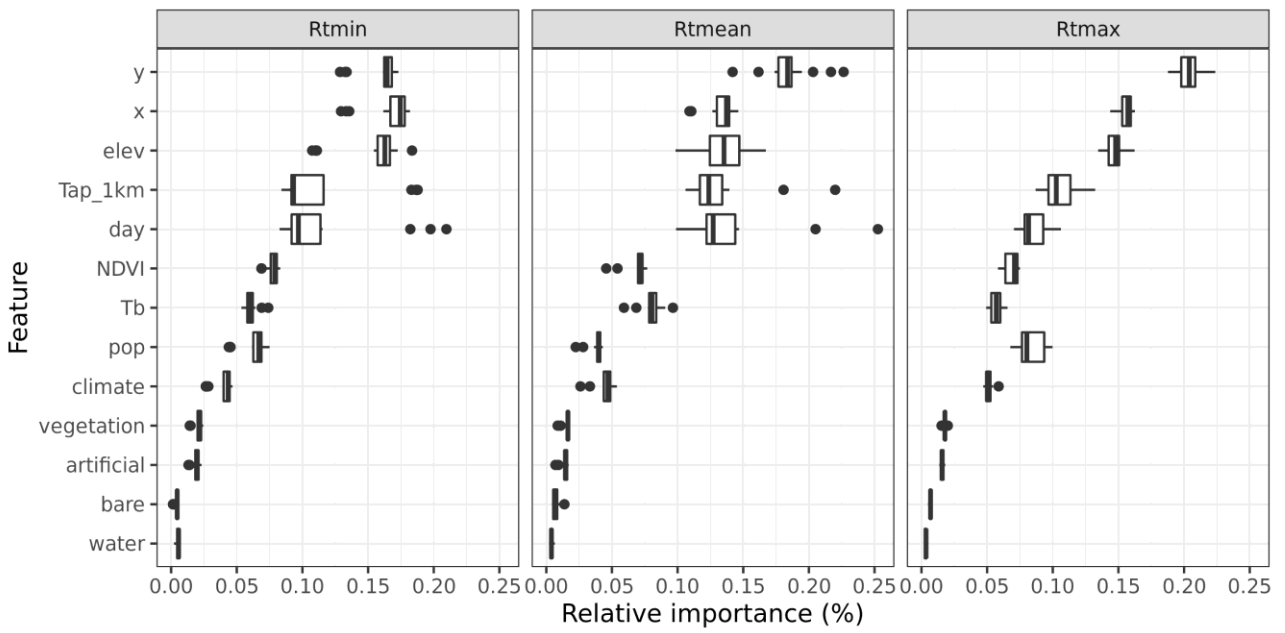

**Fig. S2.** Relative importance (%) of the predictors in the stage 3 random forest model (predicting 200 m residual). Each box shows the distribution for the different model years (2000 – 2016).

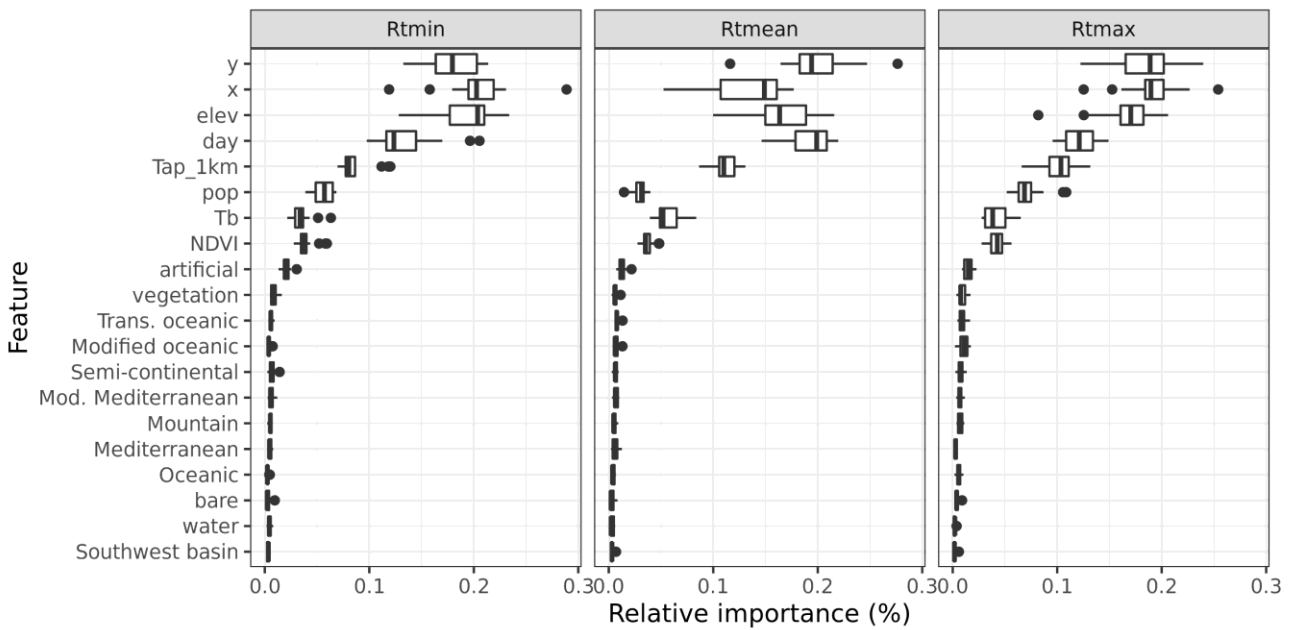

**Fig. S3.** Relative importance (%) of the predictors in the stage 3 XGBoost model (predicting 200 m residual). Each box shows the distribution for the different model years (2000 – 2016).



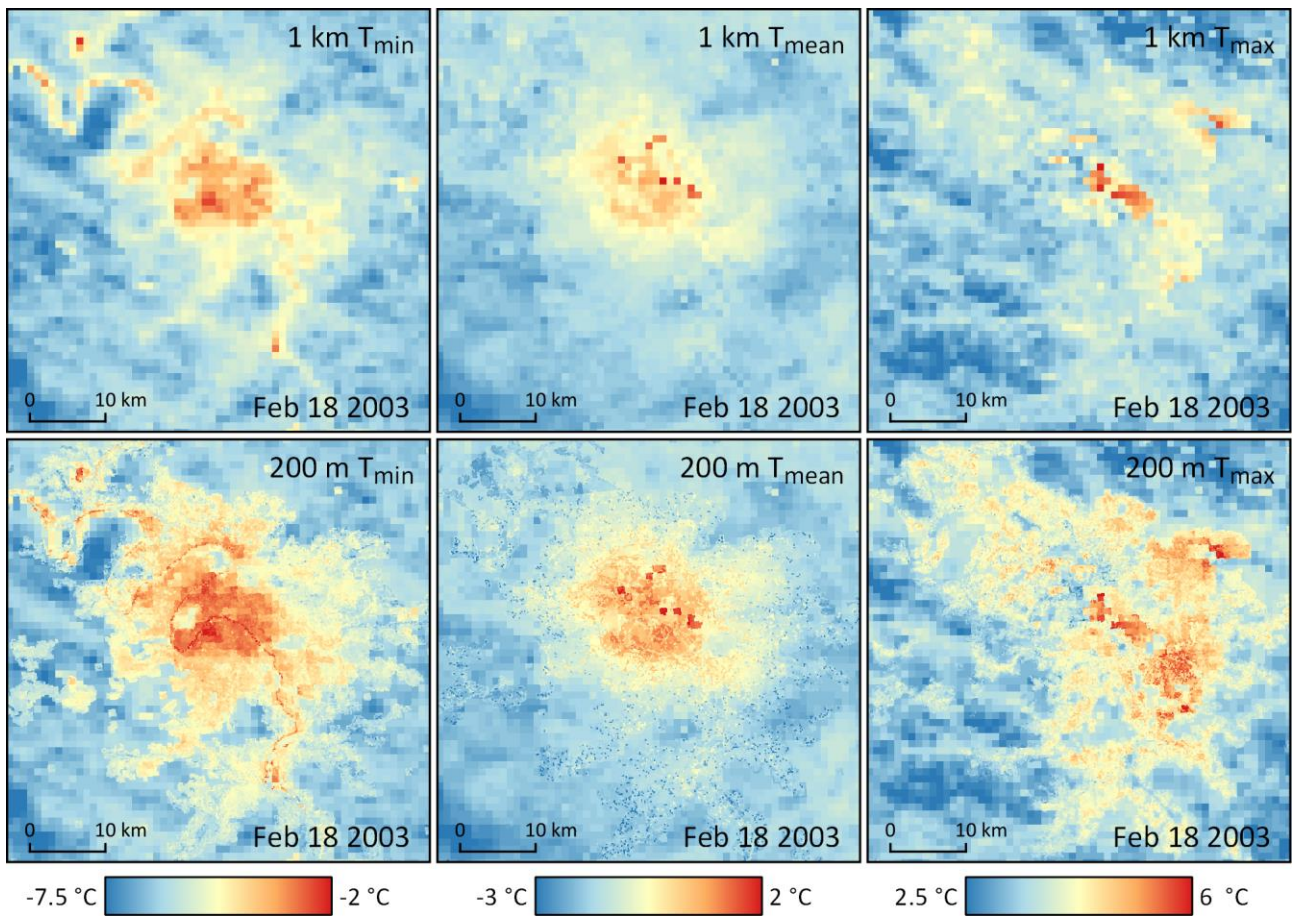

**Fig. S4.** Predicted 1 km  $T_a$  from the stage 2 model alone (top row) and with predicted 200 m  $T_{min}$  from the stage 4 model overlaid (bottom row) on Feb 18, 2003 over the Paris metropolitan area.

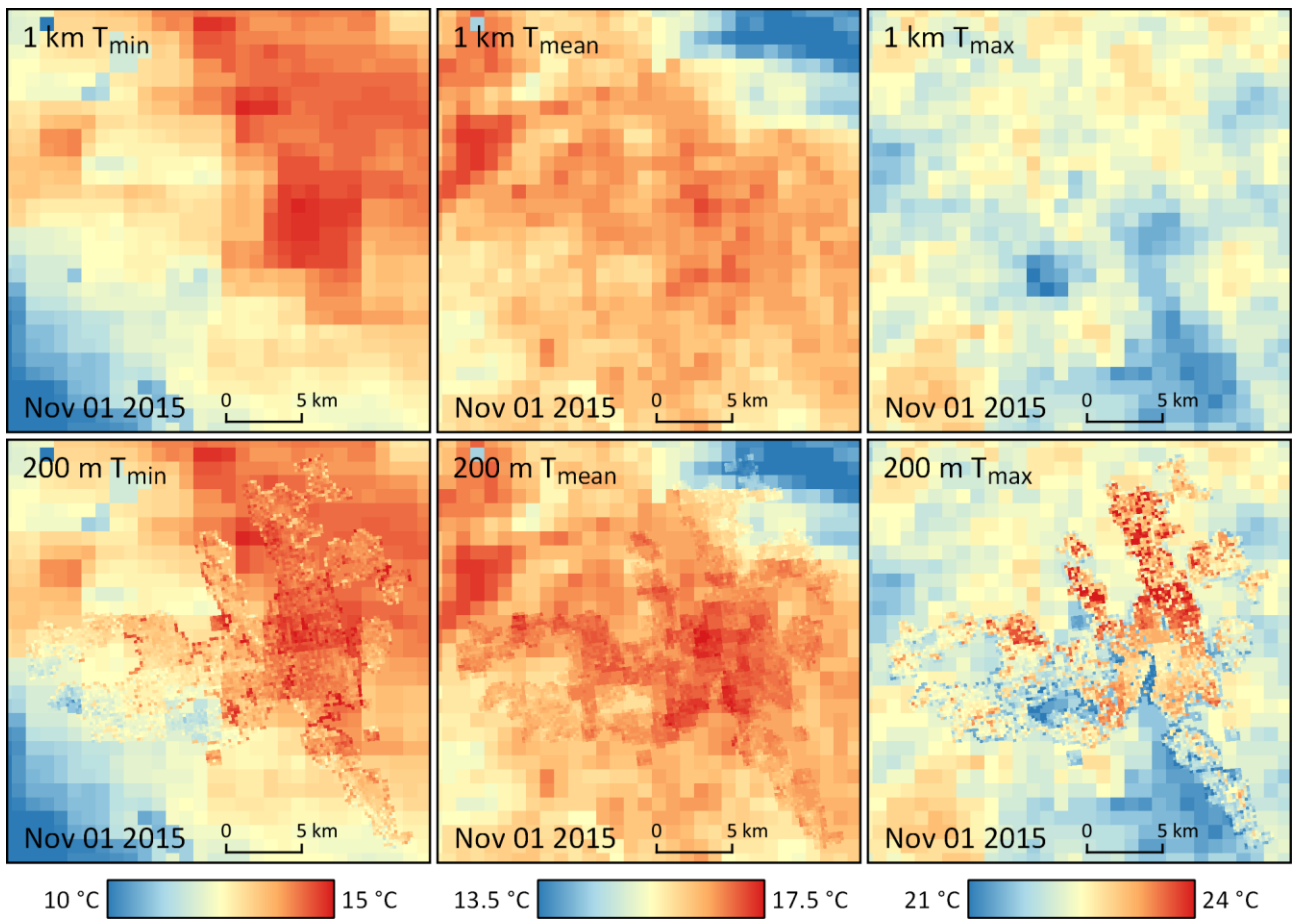

**Fig. S5.** Predicted 1 km  $T_a$  from the stage 2 model alone (top row) and with predicted 200 m  $T_{min}$  from the stage 4 model overlaid (bottom row) on Nov 01, 2015 over the city of Toulouse.

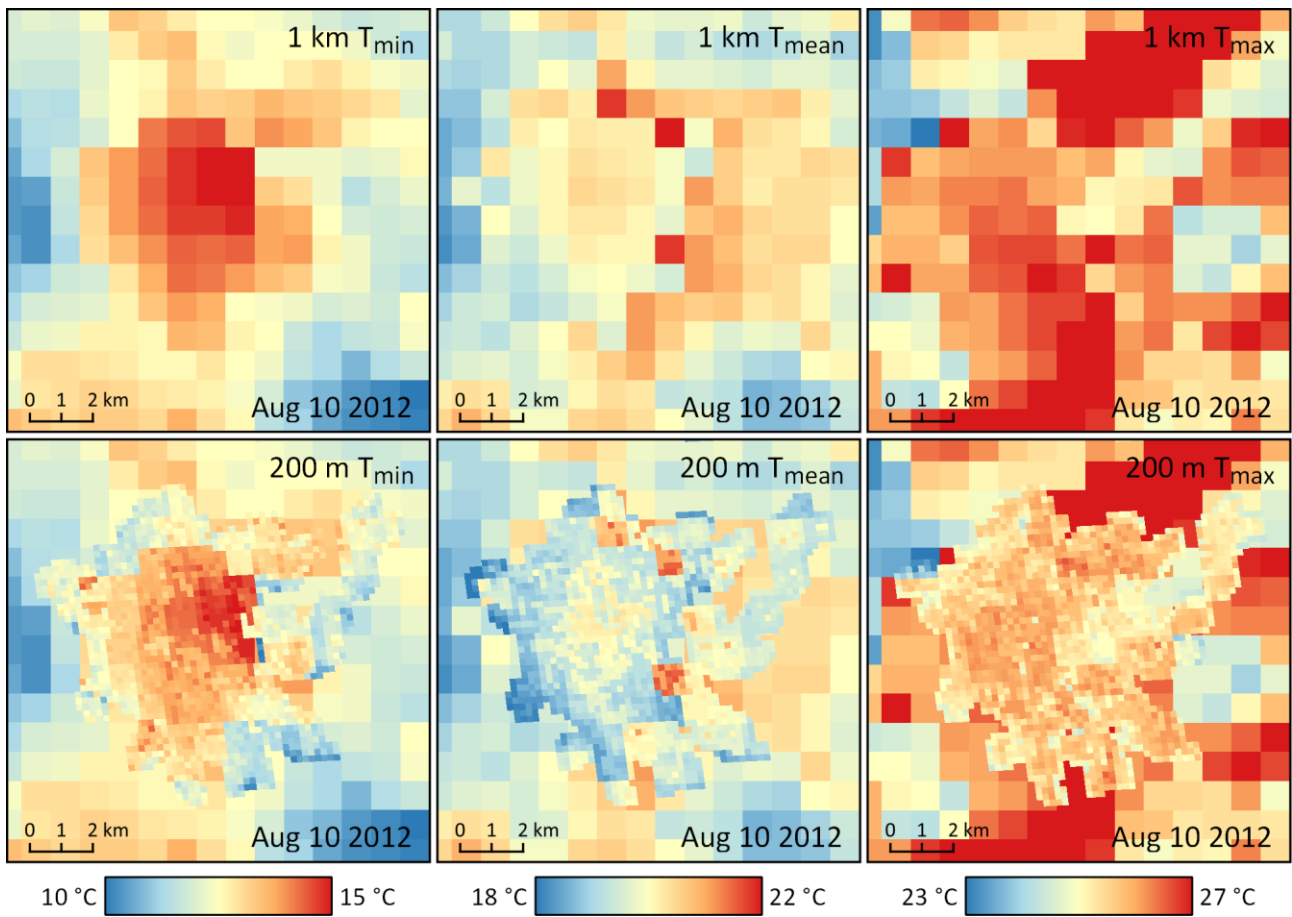

**Fig. S6.** Predicted 1 km  $T_a$  from the stage 2 model alone (top row) and with predicted 200 m  $T_{min}$  from the stage 4 model overlaid (bottom row) on Aug 10, 2012 over the city of Nancy.
